# Supplementary material
Source: PubMed Central journal article supplement (PMC11262548)
Supplement: NIHMS2006484-supplement-Supplementary_1.pdf [file NIHMS2006484-supplement-Supplementary_1.pdf]

# **Trends in Blood Pressure Among Adults with Hypertension: United States, 2003-2012**

Sung Sug (Sarah) Yoon<sup>1</sup>, Qiuping Gu<sup>1</sup>, Tatiana Nwankwo<sup>1</sup>, Jacqueline D. Wright<sup>2</sup>, Yuling Hong<sup>3</sup>, Vicki Burt<sup>1</sup>

## **ONLINE SUPPLEMENT**

### **Short Title: Trends in Blood Pressure Among Adults with Hypertension**

<sup>1</sup> Division of Health and Nutrition Examination Surveys

National Center for Health Statistics

Centers for Disease Control and Prevention

Hyattsville, MD

<sup>2</sup> Epidemiology Branch,

Program in Prevention and Population Sciences

Division of Cardiovascular Sciences

National Heart, Lung, and Blood Institute

National Institutes of Health

6701 Rockledge Dr., MSC 7936

Bethesda, MD 20892-7936

<sup>3</sup> Division for Heart Disease and Stroke Prevention,

National Center for Chronic Disease Prevention and Health Promotion

Centers for Disease Control and Prevention

4770 Buford Hwy, N.E., MS K-47

Atlanta, GA 30341

**Table S1.** Age-adjusted percent of awareness, treatment and control of hypertension among adults with hypertension by gender and race/ethnicity, 2003-2004 through 2011-2012

| <b>Characteristics</b>            | <b>2003-2004</b>        | <b>2005-2006</b> | <b>2007-2008</b> | <b>2009-2010</b> | <b>2011-2012</b> |
|-----------------------------------|-------------------------|------------------|------------------|------------------|------------------|
|                                   | % (SE)                  | % (SE)           | % (SE)           | % (SE)           | % (SE)           |
|                                   | n=1660                  | n= 1518          | n=2113           | n= 2116          | n=1844           |
|                                   | <b><u>Awareness</u></b> |                  |                  |                  |                  |
| <b>Overall</b>                    | 75.2 (1.8)              | 77.8 (1.5)       | 79.7 (1.1)       | 81.6 (1.5)       | 82.1 (1.8) *     |
| <b>Gender</b>                     |                         |                  |                  |                  |                  |
| Men                               | 77.2 (2.4)              | 74.7 (1.8)       | 77.1 (1.9)       | 79.1 (1.6)       | 79.6 (1.8)       |
| Women                             | 73.9 (2.6)              | 83.2 (1.9)       | 82.8 (1.2)       | 84.9 (1.5)       | 84.8 (2.3) *     |
| <b>Race/ethnicity<sup>†</sup></b> |                         |                  |                  |                  |                  |
| Whites, Non-Hispanic              | 74.7 (2.3)              | 77.3 (1.7)       | 80.7 (1.5)       | 81.2 (2.1)       | 82.1 (2.6) *     |
| Blacks, Non-Hispanic              | 77.2 (3.1)              | 82.5 (1.9)       | 83.3 (1.9)       | 86.8 (2.2)       | 85.3(2.6) *      |
| Mexican Americans                 | 72.3 (2.7)              | 70.5 (5.8)       | 68.8 (2.6)       | 73.8 (2.8)       | 80.9 (3.5) *     |
|                                   | <b><u>Treatment</u></b> |                  |                  |                  |                  |
| <b>Overall</b>                    | 65.0 (2.2)              | 67.8 (1.6)       | 71.6 (1.2)       | 75.9 (1.7)       | 74.5 (1.9) **    |
| <b>Gender</b>                     |                         |                  |                  |                  |                  |
| Men                               | 65.8 (3.0)              | 64.8 (1.8)       | 68.2 (2.0)       | 72.3 (1.5)       | 69.6 (1.5) *     |
| Women                             | 64.4 (2.4)              | 74.2 (1.8)       | 75.7 (1.1)       | 80.5 (2.1)       | 79.8 (2.5) *     |
| <b>Race/ethnicity<sup>†</sup></b> |                         |                  |                  |                  |                  |
| Whites, Non-Hispanic              | 64.3 (2.5)              | 67.7 (2.0)       | 72.5 (1.4)       | 76.2 (2.3)       | 75.8 (2.7) *     |
| Blacks, Non-Hispanic              | 69.3 (3.1)              | 74.6 (2.1)       | 74.3 (2.4)       | 79.1 (2.7)       | 76.5 (1.4) *     |
| Mexican Americans                 | 64.3 (2.0)              | 55.6 (7.0)       | 63.3 (2.1)       | 66.3 (3.6)       | 71.5 (5.1) *     |

|                                   |            |            | <u>Controlled</u> |            |              |
|-----------------------------------|------------|------------|-------------------|------------|--------------|
| <b>Overall</b>                    | 39.4 (2.2) | 43.4 (1.4) | 48.4 (1.6)        | 53.1 (1.7) | 51.8 (1.4) * |
| <b>Gender</b>                     |            |            |                   |            |              |
| Men                               | 42.8 (3.4) | 43.3 (2.1) | 47.0 (2.1)        | 49.9 (1.9) | 49.1 (2.1) * |
| Women                             | 37.3 (2.5) | 46.7 (1.7) | 50.7 (1.6)        | 57.7 (2.3) | 55.7 (3.1) * |
| <b>Race/ethnicity<sup>†</sup></b> |            |            |                   |            |              |
| White, Non-Hispanic               | 40.8 (2.8) | 44.6 (1.6) | 51.0 (1.7)        | 56.2 (2.1) | 54.3 (3.3) * |
| Black, Non-Hispanic               | 37.7 (2.6) | 42.9 (1.8) | 44.9 (2.1)        | 47.6 (2.9) | 49.4 (2.5) * |
| Mexican Americans                 | 34.3 (3.8) | 35.1 (3.9) | 41.2 (2.2)        | 35.7 (2.4) | 45.3 (6.3)   |

---

\* *P-trend* < 0.05

† Other racial/ethnic groups not shown separately

Age standardization was computed by the direct method using weights based on the subpopulation of individuals with hypertension in NHANES 2007-2008<sup>20</sup>
